# Supplementary material for: Association of vitamin C, vitamin D, vitamin E and risk of bladder cancer: a dose-response meta-analysis
Source: PubMed Central journal article supplement (PMC5386108; doi:10.1038/srep09599), 2015-04-23
Supplement: srep09599-s1.pdf [file srep09599-s1.pdf]

Title: Association of vitamin C, vitamin D, vitamin E and risk of bladder cancer: a dose-response meta-analysis

Authors: Fuqiang Chen, Qingshu Li, Yang Yu, Wenrong Yang, Fei Shi, Yan Qu

Journal: Scientific Reports

Supplementary table 1 characteristics of the studies included in this meta-analysis

| Author<br>Country                              | Design,<br>Study name                              | Age<br>(mean,<br>years)       | Subjects<br>(cases),<br>sex | Follow<br>-up<br>(years)  | Exposure<br>(assessment<br>method) | RR (95% CI) for the<br>highest vs. lowest<br>categories                                                                                                                                                   | Covariates adjusted                                                                                                                       |
|------------------------------------------------|----------------------------------------------------|-------------------------------|-----------------------------|---------------------------|------------------------------------|-----------------------------------------------------------------------------------------------------------------------------------------------------------------------------------------------------------|-------------------------------------------------------------------------------------------------------------------------------------------|
| Helzlsouer<br>et al. 1989,<br>USA <sup>1</sup> | Cohort<br>(NCC)<br>Washington<br>County<br>project | 58.9                          | 105<br>(35),<br>both        | 12                        | ---                                | a-Tocopherol (circulating)<br>0.57 (0.12-2.71)                                                                                                                                                            | Sex, race, within 2 h for the interval<br>between blood collection and the<br>previous meal, cigarette smoking and<br>vitamin supplements |
| Nomura et<br>al. 1991,<br>USA <sup>2</sup>     | Matched<br>case-control<br>(PCC)                   | 66.0 (men)<br>70.4<br>(women) | 522<br>(261),<br>both       | ---                       | Interview                          | Vitamin C (diet)<br>Men: 1.0 (0.6-1.7)<br>Women: 0.6 (0.2-1.4)<br>Vitamin C (supplement)<br>Men: 1.2 (0.8-1.8)<br>Women: 0.5 (0.3-1.1)<br>Vitamin C (total)<br>Men: 1.2 (0.8-2.1)<br>Women: 0.4 (0.2-1.1) | Sex, age, ethnic group, and pack-years<br>of cigarette smoking.                                                                           |
| Riboli et al.<br>1991,<br>Spain <sup>3</sup>   | Matched<br>case-control<br>(HCC)                   | ---                           | 1221<br>(432),<br>men       | ---                       | Interview                          | Vitamin C (diet)<br>1.03 (0.72-1.48)<br>Vitamin E (diet)<br>0.72 (0.48-1.09)                                                                                                                              | Age, area of residence                                                                                                                    |
| Shibata et<br>al. 1992,<br>USA <sup>4</sup>    | Cohort                                             | 74.9                          | 11580<br>(71),<br>men       | 70159<br>person-<br>years | FFQ                                | Men:<br>Vitamin C (diet)<br>0.94 (0.52-1.70)<br>Vitamin C (supplement)<br>0.58 (0.36-0.93)<br>Vitamin E (supplement)                                                                                      | Age and smoking                                                                                                                           |

|                                        |                            |                  |        |     |                         |                        |                                                                                                                                                                                                           |
|----------------------------------------|----------------------------|------------------|--------|-----|-------------------------|------------------------|-----------------------------------------------------------------------------------------------------------------------------------------------------------------------------------------------------------|
| Bruemmer et al. 1996, USA <sup>5</sup> | Case-control (PCC)         | 58.3             | 667    | --- | Interview (supplement ) | 0.74 (0.46-1.20)       | Age, sex, county, smoking, and calories (for diet and total)                                                                                                                                              |
|                                        |                            | (cases)          | (262), |     |                         | Vitamin C (diet)       |                                                                                                                                                                                                           |
|                                        |                            | 57.1             | both   |     |                         | 0.50 (0.28-0.88)       |                                                                                                                                                                                                           |
|                                        |                            | (controls)       |        |     |                         | Vitamin C (supplement) |                                                                                                                                                                                                           |
|                                        |                            |                  |        |     |                         | 0.40 (0.21-0.76)       |                                                                                                                                                                                                           |
|                                        |                            |                  |        |     |                         | Vitamin C (total)      |                                                                                                                                                                                                           |
|                                        |                            |                  |        |     |                         | 0.45 (0.26-0.79)       |                                                                                                                                                                                                           |
|                                        |                            |                  |        |     |                         | Vitamin E (diet)       |                                                                                                                                                                                                           |
|                                        |                            |                  |        |     |                         | 0.59 (0.31-1.14)       |                                                                                                                                                                                                           |
|                                        |                            |                  |        |     |                         | Vitamin E (supplement) |                                                                                                                                                                                                           |
| Michaud et al. 2000, USA <sup>6</sup>  | Cohort, HPFS               | 40-75            | 47909  | 12  | FFQ                     | 0.61 (0.34-1.08)       | Age, energy, pack-years of smoking history, current smoking status, geographic region of the United States, total fluid intake, and cruciferous vegetable intake, and total fluid intake (for supplement) |
|                                        |                            | (320),           | men    |     |                         | Vitamin C (total)      |                                                                                                                                                                                                           |
|                                        |                            |                  |        |     |                         | 0.90 (0.62-1.31)       |                                                                                                                                                                                                           |
|                                        |                            |                  |        |     |                         | Vitamin E (total)      |                                                                                                                                                                                                           |
|                                        |                            |                  |        |     |                         | 0.64 (0.45-0.92)       |                                                                                                                                                                                                           |
|                                        |                            |                  |        |     |                         | Vitamin D (total)      |                                                                                                                                                                                                           |
|                                        |                            |                  |        |     |                         | 1.06 (0.75-1.50)       |                                                                                                                                                                                                           |
|                                        |                            |                  |        |     |                         | Vitamin C (supplement) |                                                                                                                                                                                                           |
|                                        |                            |                  |        |     |                         | 0.73 (0.48-1.10)       |                                                                                                                                                                                                           |
|                                        |                            |                  |        |     |                         | Vitamin E (supplement) |                                                                                                                                                                                                           |
| Wakai et al. 2000, Japan <sup>7</sup>  | Matched case-control (HCC) | 66.6             | 592    | --- | Interview               | 0.83 (0.45-1.52)       | Sex, age, hospital, smoking and occupational history as a cook                                                                                                                                            |
|                                        |                            | (cases)          | (297), |     |                         | Vitamin C (diet)       |                                                                                                                                                                                                           |
|                                        |                            | 66.5             | both   |     |                         | 0.74 (0.43-1.26)       |                                                                                                                                                                                                           |
|                                        |                            | (controls)       |        |     |                         | Vitamin E (diet)       |                                                                                                                                                                                                           |
|                                        |                            |                  |        |     |                         | 0.65 (0.39-1.09)       |                                                                                                                                                                                                           |
|                                        |                            |                  |        |     |                         | Vitamin C (total)      |                                                                                                                                                                                                           |
|                                        |                            | 0.81 (0.49-1.35) |        |     |                         |                        |                                                                                                                                                                                                           |

|                                               |                                           |                                 |                          |     |     |                                                                                                                                                                                                                   |                                                                                                                                                                                                                                         |
|-----------------------------------------------|-------------------------------------------|---------------------------------|--------------------------|-----|-----|-------------------------------------------------------------------------------------------------------------------------------------------------------------------------------------------------------------------|-----------------------------------------------------------------------------------------------------------------------------------------------------------------------------------------------------------------------------------------|
| Zeegers et al. 2001, Netherlands <sup>8</sup> | Cohort, Netherlands Cohort Study          | 62.7 (cases)<br>61.4 (controls) | 3692 (569), both         | 6.3 | FFQ | Vitamin E (total)<br>0.68 (0.41-1.12)<br>Vitamin C (diet)<br>0.81 (0.61-1.07)<br>Vitamin E (diet)<br>0.98 (0.68-1.41)<br>Vitamin C (supplement)<br>1.01 (0.69-1.48)<br>Vitamin E (supplement)<br>1.05 (0.63-1.73) | Age, sex, cigarette smoking amount and cigarette smoking duration                                                                                                                                                                       |
| Jacobs et al. 2002, USA <sup>9</sup>          | Cohort, Cancer Prevention Study II Cohort | Main (40-70)                    | 991522 (1289), both      | 18  | FFQ | Vitamin C (supplement)<br>1.25 (0.91-1.72)<br>Vitamin E (supplement)<br>0.60 (0.37-0.96)                                                                                                                          | Age, sex (in combined-sex models), educational level, cigarette smoking (current or former status and number of pack-years), consumption of citrus fruits/juices, consumption of vegetables, and vitamin C and vitamin E supplement use |
| Michaud et al. 2002, Finland <sup>10</sup>    | Cohort, ATBC cohort                       | 50-69                           | 27111 (344), men smokers | 11  | FFQ | Vitamin C (diet)<br>1.35 (0.95-1.91)<br>Vitamin E (diet)<br>0.79 (0.56-1.11)                                                                                                                                      | Age, duration of smoking, smoking dose, total energy, and trial intervention (alpha-tocopherol and beta-carotene supplements)                                                                                                           |
| Nomura et al. 2003, USA <sup>11</sup>         | Cohort (NCC), none                        | 73.2                            | 219 (109), men           | >20 | --- | $\alpha$ -Tocopherol (circulating):<br>0.90 (0.40-2.01)<br>$\gamma$ -Tocopherol (circulating):<br>1.20 (0.50-2.86)<br>Total Tocopherol (circulating):<br>0.75 (0.33-1.72)                                         | Age, pack-years of cigarette smoking, serum triglyceride and hours since last meal                                                                                                                                                      |

|                                           |                              |                                   |                    |     |           |                                                                                                                                                                            |                                                                                                                                                                                                                                                             |
|-------------------------------------------|------------------------------|-----------------------------------|--------------------|-----|-----------|----------------------------------------------------------------------------------------------------------------------------------------------------------------------------|-------------------------------------------------------------------------------------------------------------------------------------------------------------------------------------------------------------------------------------------------------------|
| Castelao et al. 2004, USA <sup>12</sup>   | Matched case-control (PCC)   | 56.3 (cases)<br>56.4 (controls)   | 3184 (1592), both  | --- | Interview | Vitamin C (diet)<br>0.73 (0.56-0.95)                                                                                                                                       | Sex, date of birth, race, level of education, number of cigarettes smoked per day, number of years of smoking, smoking status in reference year, lifetime use of nonsteroidal anti-inflammatory drugs, and number of years employed as a hairdresser/barber |
| Holick et al. 2005, USA <sup>13</sup>     | Cohort, Nurses' Health Study | 30-55                             | 88796 (237), women | 20  | FFQ       | Vitamin C (total)<br>1.03 (0.69-1.53)<br>Vitamin E (total)<br>1.26 (0.85-1.89)<br>Vitamin C (supplement)<br>1.09 (0.70-1.69)<br>Vitamin E (supplement)<br>0.72 (0.37-1.42) | Age, pack-years of cigarette smoking, current smoking, and total caloric intake                                                                                                                                                                             |
| Hung et al. 2006, USA <sup>14</sup>       | Case-control (PCC)           | 60.2                              | 257 (84), both     | --- | ---       | $\alpha$ -Tocopherol (circulating):<br>0.91 (0.17-4.95)<br>$\gamma$ -Tocopherol (circulating):<br>1.81 (0.38-8.64)                                                         | Age, sex, pack-years and education                                                                                                                                                                                                                          |
| Kellen et al. 2006, Belgium <sup>15</sup> | Case-control (PCC)           | 67.67 (cases)<br>64.24 (controls) | 540 (178), both    | --- | Interview | Vitamin C (diet)<br>0.65 (0.39-1.11)<br>Vitamin E (diet)<br>0.68 (0.41-1.13)                                                                                               | Sex, age, smoking status, number of cigarettes smoked per day, number of years smoking and occupational exposure to polycyclic aromatic hydrocarbons or aromatic amines                                                                                     |
| Liang et al. 2008, USA <sup>16</sup>      | Matched case-control (PCC)   | 63.1 (cases)<br>62.6 (controls)   | 675 (386), both    | --- | Interview | $\alpha$ -Tocopherol (circulating):<br>0.50 (0.3-0.78)<br>$\gamma$ -Tocopherol (circulating):<br>1.52 (0.95-2.44)<br>$\alpha$ -Tocopherol (diet):                          | Age, sex, ethnicity, smoking status, number of cigarettes smoked per day, smoking duration, and plasma cholesterol (for circulating)                                                                                                                        |

|                                             |                                              |                                    |                   |      |           |                              |                                                                                                                                                                                                                                                                                                                                           |
|---------------------------------------------|----------------------------------------------|------------------------------------|-------------------|------|-----------|------------------------------|-------------------------------------------------------------------------------------------------------------------------------------------------------------------------------------------------------------------------------------------------------------------------------------------------------------------------------------------|
|                                             |                                              |                                    |                   |      |           | 0.85 (0.54-1.32)             |                                                                                                                                                                                                                                                                                                                                           |
|                                             |                                              |                                    |                   |      |           | $\gamma$ -Tocopherol (diet): |                                                                                                                                                                                                                                                                                                                                           |
|                                             |                                              |                                    |                   |      |           | 1.18 (0.71-1.97)             |                                                                                                                                                                                                                                                                                                                                           |
| Roswall et al. 2009, Denmark <sup>17</sup>  | Cohort, Danish Diet, Cancer and Health Study | 50-64                              | 55557 (322), both | 10.6 | FFQ       | Vitamin C (total)            | Total intake of the three other micronutrients (vitamin C, vitamin E, folate and beta-carotene) as well as dietary intake for the supplemental intake and supplemental intake for the dietary intake and further for smoking status, smoking duration, smoking intensity, possible cessation and when, passive smoking, and work exposure |
|                                             |                                              |                                    |                   |      |           | 1.23 (0.87-1.75)             |                                                                                                                                                                                                                                                                                                                                           |
|                                             |                                              |                                    |                   |      |           | Vitamin C (diet)             |                                                                                                                                                                                                                                                                                                                                           |
|                                             |                                              |                                    |                   |      |           | 0.99 (0.70-1.39)             |                                                                                                                                                                                                                                                                                                                                           |
|                                             |                                              |                                    |                   |      |           | Vitamin C (supplement)       |                                                                                                                                                                                                                                                                                                                                           |
|                                             |                                              |                                    |                   |      |           | 1.19 (0.86-1.66)             |                                                                                                                                                                                                                                                                                                                                           |
|                                             |                                              |                                    |                   |      |           | Vitamin E (total)            |                                                                                                                                                                                                                                                                                                                                           |
|                                             |                                              |                                    |                   |      |           | 1.12 (0.78-1.59)             |                                                                                                                                                                                                                                                                                                                                           |
|                                             |                                              |                                    |                   |      |           | Vitamin E (diet)             |                                                                                                                                                                                                                                                                                                                                           |
|                                             |                                              |                                    |                   |      |           | 1.07 (0.76-1.51)             |                                                                                                                                                                                                                                                                                                                                           |
|                                             |                                              |                                    |                   |      |           | Vitamin E (supplement):      |                                                                                                                                                                                                                                                                                                                                           |
|                                             |                                              |                                    |                   |      |           | 0.97 (0.66-1.44)             |                                                                                                                                                                                                                                                                                                                                           |
| Brinkman et al. 2010, USA <sup>18</sup>     | Case-control (PCC)                           | 62 (cases)<br>60.7<br>(controls)   | 661 (322), both   | ---  | Interview | Vitamin D (total)            | Age, sex, smoking status, pack years smoked, and total energy intake                                                                                                                                                                                                                                                                      |
|                                             |                                              |                                    |                   |      |           | 0.58 (0.31-1.06)             |                                                                                                                                                                                                                                                                                                                                           |
|                                             |                                              |                                    |                   |      |           | Vitamin E (total)            |                                                                                                                                                                                                                                                                                                                                           |
|                                             |                                              |                                    |                   |      |           | 0.66 (0.36-1.20)             |                                                                                                                                                                                                                                                                                                                                           |
|                                             |                                              |                                    |                   |      |           | Vitamin C (total)            |                                                                                                                                                                                                                                                                                                                                           |
|                                             |                                              |                                    |                   |      |           | 0.78 (0.45-1.38)             |                                                                                                                                                                                                                                                                                                                                           |
| Brinkman et al. 2011, Belgium <sup>19</sup> | Case-control (PCC)                           | 67.6 (cases)<br>64.2<br>(controls) | 586 (200), both   | ---  | FFQ       | Vitamin D (total)            | Age, sex, smoking status, number of cigarettes smoked per day, number of years of cigarette smoking and exposure to occupational carcinogens and energy intake                                                                                                                                                                            |
|                                             |                                              |                                    |                   |      |           | 1.03 (0.62-1.72)             |                                                                                                                                                                                                                                                                                                                                           |
| Amaral et al. 2012, Denmark <sup>20</sup>   | Matched case-control (HCC)                   | 68 (cases)<br>66<br>(controls)     | 2153 (1125), both | ---  | ---       | Vitamin D (circulating)      | Age, sex, ethnic origin, region, smoking status, and season of blood collection                                                                                                                                                                                                                                                           |
|                                             |                                              |                                    |                   |      |           | 0.55 (0.35-0.84)             |                                                                                                                                                                                                                                                                                                                                           |

|                                           |                                           |                          |                                         |      |     |                                                                                                                                               |                                                                                                                                                                                                                                                                                                                                                                                                                                             |
|-------------------------------------------|-------------------------------------------|--------------------------|-----------------------------------------|------|-----|-----------------------------------------------------------------------------------------------------------------------------------------------|---------------------------------------------------------------------------------------------------------------------------------------------------------------------------------------------------------------------------------------------------------------------------------------------------------------------------------------------------------------------------------------------------------------------------------------------|
| Mondul et al. 2012, Finland <sup>21</sup> | Cohort (NCC), ATBC cohort                 | 58.6                     | 500 (250), men smokers                  | 11   | --- | Vitamin D (circulating)<br>0.61 (0.36-1.05)                                                                                                   | Age, date of baseline blood draw, number of cigarettes per day, years of smoking, and vitamin D binding protein                                                                                                                                                                                                                                                                                                                             |
| Mondul et al. 2012, USA <sup>22</sup>     | Cohort (NCC), PLCO Cancer Screening Study | 64                       | 733 (369), both                         | 13   | --- | Vitamin D (circulating)<br>1.19 (0.74-1.92)                                                                                                   | Age, race, sex, and date of blood collection, smoking status, pack-years of smoking, dairy consumption, and use of aspirin or ibuprofen                                                                                                                                                                                                                                                                                                     |
| Ros et al. 2012, Europe <sup>23</sup>     | Cohort (NCC), EPIC                        | 58.5                     | 1712 (856), both                        | 11.0 | FFQ | Vitamin C (circulating)<br>0.85 (0.61-1.17)<br>Vitamin C (diet)<br>1.11 (0.82-1.51)                                                           | Sex, age at baseline, study center, date and time of blood collection, fasting status, smoking status, duration, and intensity                                                                                                                                                                                                                                                                                                              |
| Afzal et al. 2013, Denmark <sup>24</sup>  | Cohort, Copenhagen City Heart Study       | 20-100                   | 9791 (112), both                        | 28   | --- | Vitamin D (circulating)<br>0.78 (0.65-0.94)                                                                                                   | Age, sex, pack-years, BMI, alcohol consumption, leisure time and work-related physical activity, and duration of education                                                                                                                                                                                                                                                                                                                  |
| Park et al. 2013, USA <sup>25</sup>       | Cohort, Multiethnic Cohort Study          | Men: 60.2<br>Women: 59.7 | Men: 83694 (429)<br>Women: 102191 (152) | 12.5 | FFQ | Vitamin C (diet)<br>Men: 0.83 (0.62-1.11)<br>Women: 0.46 (0.28-0.73)<br>Vitamin E (diet)<br>Men: 0.97 (0.74-1.27)<br>Women: (0.48 (0.29-0.78) | Age at cohort entry, ethnicity, total energy intake, first-degree family history of bladder cancer, employment in a high-risk industry, smoking status, average number of cigarettes, squared average number of cigarettes, number of years smoked (time dependent), number of years since quitting (time dependent), interactions of ethnicity with smoking status, average number of cigarettes, and squared average number of cigarettes |

---

ATBC: Alpha-Tocopherol, Beta-Carotene Cancer Prevention (ATBC) Study, BMI: body mass index, EPIC: European Prospective Investigation into Cancer and Nutrition, FFQ: food frequency questionnaire, HCC: hospital-based case-control study, HPFS: Health Professionals Follow-Up Study, NCC: nested case-control study, PCC: population-based case-control study, PLCO: Prostate, Lung, Colorectal, and Ovarian Cancer Screening Trial



Supplementary table 2 Pooled results on vitamin C and risk of bladder cancer

|                                   | Diet plus supplement |                  |           |                | Diet |                         |           |                | Supplement |                  |           |                |
|-----------------------------------|----------------------|------------------|-----------|----------------|------|-------------------------|-----------|----------------|------------|------------------|-----------|----------------|
|                                   | N                    | RR<br>(95% CI)   | I2<br>(%) | P <sup>a</sup> | N    | RR<br>(95% CI)          | I2<br>(%) | P <sup>a</sup> | N          | RR<br>(95% CI)   | I2<br>(%) | P <sup>a</sup> |
| Total                             | 8                    | 0.86 (0.67-1.10) | 52.5      |                | 14   | <b>0.84 (0.73-0.98)</b> | 47.5      |                | 9          | 0.87 (0.69-1.11) | 64.9      |                |
| By design                         |                      |                  |           | 0.18           |      |                         |           | 0.28           |            |                  |           | 0.28           |
| Cohort                            | 3                    | 1.05 (0.85-1.31) | 0.00      |                | 7    | 0.91 (0.73-1.13)        | 61.5      |                | 6          | 0.97 (0.77-1.22) | 51.9      |                |
| Case-control                      | 5                    | 0.71 (0.48-1.05) | 56.0      |                | 7    | <b>0.77 (0.65-0.92)</b> | 7.50      |                | 3          | 0.64 (0.31-1.34) | 80.5      |                |
| By age (years)                    |                      |                  |           | 0.76           |      |                         |           | 0.96           |            |                  |           | 0.67           |
| ≥60                               | 4                    | 0.82 (0.56-1.19) | 41.1      |                | 8    | <b>0.84 (0.73-0.98)</b> | 0.00      |                | 4          | 0.81 (0.55-1.20) | 65.1      |                |
| <60                               | 4                    | 0.89 (0.62-1.27) | 67.7      |                | 6    | 0.83 (0.61-1.12)        | 76.4      |                | 5          | 0.92 (0.66-1.28) | 69.5      |                |
| Country                           |                      |                  |           | 0.66           |      |                         |           | 0.15           |            |                  |           | 0.34           |
| USA                               | 6                    | 0.79 (0.58-1.08) | 54.8      |                | 7    | <b>0.72 (0.59-0.88)</b> | 27.3      |                | 7          | 0.80 (0.58-1.09) | 70.4      |                |
| Europe                            | 1                    | 1.23 (0.87-1.74) | ---       |                | 6    | 0.99 (0.83-1.18)        | 38.0      |                | 2          | 1.11 (0.87-1.42) | 0.00      |                |
| Japan                             | 1                    | 0.81 (0.49-1.35) | ---       |                | 1    | 0.74 (0.43-1.26)        | 000       |                | -          | ---              | ---       |                |
| Assessment method                 |                      |                  |           | 0.18           |      |                         |           | 0.67           |            |                  |           | 0.28           |
| Interview                         | 4                    | 0.71 (0.48-1.05) | 56.0      |                | 6    | <b>0.80 (0.68-0.95)</b> | 0.00      |                | 3          | 0.64 (0.31-1.34) | 80.5      |                |
| FFQ                               | 3                    | 1.05 (0.85-1.31) | 0.00      |                | 8    | 0.86 (0.69-1.07)        | 64.5      |                | 6          | 0.97 (0.77-1.22) | 51.9      |                |
| Number of cases                   |                      |                  |           | 0.44           |      |                         |           | 0.28           |            |                  |           | 0.22           |
| ≥300                              | 3                    | 1.00 (0.77-1.30) | 63.2      |                | 8    | 0.89 (0.74-1.07)        | 62.3      |                | 4          | 1.05 (0.84-1.32) | 35.8      |                |
| <300                              | 5                    | 0.76 (0.52-1.13) | 16.8      |                | 6    | <b>0.74 (0.58-0.93)</b> | 0.00      |                | 5          | 0.72 (0.47-1.10) | 71.4      |                |
| Number of covariates <sup>b</sup> |                      |                  |           | 0.42           |      |                         |           | <b>0.01</b>    |            |                  |           | 0.89           |
| ≥4                                | 5                    | 0.80 (0.62-1.03) | 33.4      |                | 6    | <b>0.69 (0.58-0.82)</b> | 13.7      |                | 4          | 0.84 (0.55-1.29) | 74.4      |                |
| <4                                | 3                    | 0.96 (0.57-1.61) | 66.2      |                | 8    | 1.01 (0.88-1.15)        | 0.00      |                | 5          | 0.89 (0.65-1.23) | 63.9      |                |

a: P values were obtained from meta-regression

b: Number of covariates adjusted including 7 covariates: age, sex, smoking, dietary factors, occupational factors and others (education and physical activity)

Supplementary table 3 Pooled results on vitamin E and risk of bladder cancer

|                                   | Diet plus supplement |                         |           |                | Diet |                         |           |                | Supplement |                         |           |                |
|-----------------------------------|----------------------|-------------------------|-----------|----------------|------|-------------------------|-----------|----------------|------------|-------------------------|-----------|----------------|
|                                   | N                    | RR<br>(95% CI)          | I2<br>(%) | P <sup>a</sup> | N    | RR<br>(95% CI)          | I2<br>(%) | P <sup>a</sup> | N          | RR<br>(95% CI)          | I2<br>(%) | P <sup>a</sup> |
| Total                             | 6                    | 0.82 (0.62-1.08)        | 55.2      |                | 9    | <b>0.80 (0.68-0.94)</b> | 33.0      |                | 7          | <b>0.78 (0.64-0.94)</b> | 0.60      |                |
| By design                         |                      |                         |           | 0.22           |      |                         |           | 0.14           |            |                         |           | 0.18           |
| Cohort                            | 3                    | 0.96 (0.64-1.45)        | 73.1      |                | 5    | 0.86 (0.69-1.08)        | 51.3      |                | 6          | 0.82 (0.67-1.01)        | 0.00      |                |
| Case-control                      | 3                    | <b>0.65 (0.47-0.90)</b> | 0.00      |                | 4    | <b>0.67 (0.52-0.86)</b> | 0.00      |                | 1          | <b>0.51 (0.29-0.89)</b> | ---       |                |
| By age (years)                    |                      |                         |           | 0.43           |      |                         |           | 0.65           |            |                         |           | 0.48           |
| ≥60                               | 2                    | <b>0.67 (0.46-0.99)</b> | 68.1      |                | 5    | 0.85 (0.72-1.01)        | 0.00      |                |            | 0.87 (0.62-1.24)        | 0.00      |                |
| <60                               | 4                    | 0.88 (0.61-1.27)        | 0.00      |                | 4    | 0.74 (0.52-1.04)        | 60.9      |                |            | <b>0.73 (0.57-0.93)</b> | 9.70      |                |
| Country                           |                      |                         |           | 0.96           |      |                         |           | 0.84           |            |                         |           | 0.10           |
| USA                               | 4                    | 0.77 (0.53-1.13)        | 61.0      |                | 3    | 0.68 (0.42-1.11)        | 71.0      |                |            | <b>0.66 (0.52-0.85)</b> | 0.00      |                |
| Europe                            | 1                    | 0.68 (0.41-1.12)        | ---       |                | 5    | 0.86 (0.73-1.02)        | 0.00      |                |            | 1.00 (0.73-1.36)        | 0.00      |                |
| Japan                             | 1                    | 1.12 (0.78-1.59)        | ---       |                | 1    | 0.65 (0.39-1.09)        | ---       |                | --         | ---                     | ---       |                |
| Assessment method                 |                      |                         |           | 0.22           |      |                         |           | 0.29           |            |                         |           | 0.18           |
| Interview                         | 3                    | <b>0.65 (0.47-0.90)</b> | 0.00      |                | 3    | <b>0.69 (0.53-0.90)</b> | 0.00      |                | 1          | <b>0.51 (0.29-0.89)</b> | --        |                |
| FFQ                               | 3                    | 0.96 (0.64-1.45)        | 73.1      |                | 6    | 0.84 (0.67-1.04)        | 48.2      |                | 6          | 0.82 (0.67-1.01)        | 0.00      |                |
| Number of cases                   |                      |                         |           | 0.88           |      |                         |           | <b>0.03</b>    |            |                         |           | 0.24           |
| ≥300                              | 3                    | 0.80 (0.54-1.19)        | 62.2      |                | 5    | 0.92 (0.79-1.06)        | 0.00      |                | 4          | 0.85 (0.67-1.09)        | 5.30      |                |
| <300                              | 3                    | 0.83 (0.52-1.34)        | 64.6      |                | 4    | <b>0.59 (0.46-0.77)</b> | 0.00      |                | 3          | <b>0.65 (0.47-0.90)</b> | 0.00      |                |
| Number of covariates <sup>b</sup> |                      |                         |           | 0.31           |      |                         |           | 0.25           |            |                         |           | 0.13           |
| ≥4                                | 5                    | 0.76 (0.56-1.02)        | 49.8      |                | 5    | <b>0.69 (0.52-0.92)</b> | 47.1      |                |            | <b>0.64 (0.48-0.85)</b> | 0.00      |                |
| <4                                | 1                    | 1.12 (0.78-1.59)        | ---       |                | 4    | 0.89 (0.74-1.07)        | 0.00      |                |            | 0.92 (0.71-1.19)        | 0.00      |                |

a: P values were obtained from meta-regression

b: Number of covariates adjusted including 7 covariates: age, sex, smoking, dietary factors, occupational factors and others (education and physical activity)

Supplementary table 4 Subgroup analysis by smoking status and sex<sup>a</sup>

| Subgroup          | Vitamin C      |                  |        | Vitamin D      |                         |        | Vitamin E      |                         |        |
|-------------------|----------------|------------------|--------|----------------|-------------------------|--------|----------------|-------------------------|--------|
|                   | N <sup>b</sup> | RR (95% CI)      | I2 (%) | N <sup>b</sup> | RR (95% CI)             | I2 (%) | N <sup>b</sup> | RR (95% CI)             | I2 (%) |
| Among smokers     | 10             | 0.92 (0.80-1.05) | 67.7   | 4              | <b>0.72 (0.55-0.93)</b> | 0.00   | 9              | <b>0.77 (0.64-0.92)</b> | 68.8   |
| Among non-smokers | 5              | 0.94 (0.73-1.20) | 36.4   | 1              | 1.04 (0.50-2.16)        | ---    | 4              | 1.00 (0.94-1.05)        | 0.00   |
| Among men         | 9              | 0.95 (0.79-1.14) | 43.1   | 2              | 0.84 (0.49-1.43)        | ---    | 9              | <b>0.75 (0.65-0.86)</b> | 0.00   |
| Among women       | 4              | 0.74 (0.43-1.27) | 75.1   | ---            | ---                     | ---    | 4              | 0.74 (0.42-1.32)        | 69.2   |

a: We combined the result from diet and/or supplement and circulating levels ( $\alpha$ -Tocopherol for vitamin E) to increase the number of studies in each subgroup analysis, and the summary estimates were presented in highest vs. lowest levels.

b: number of studies

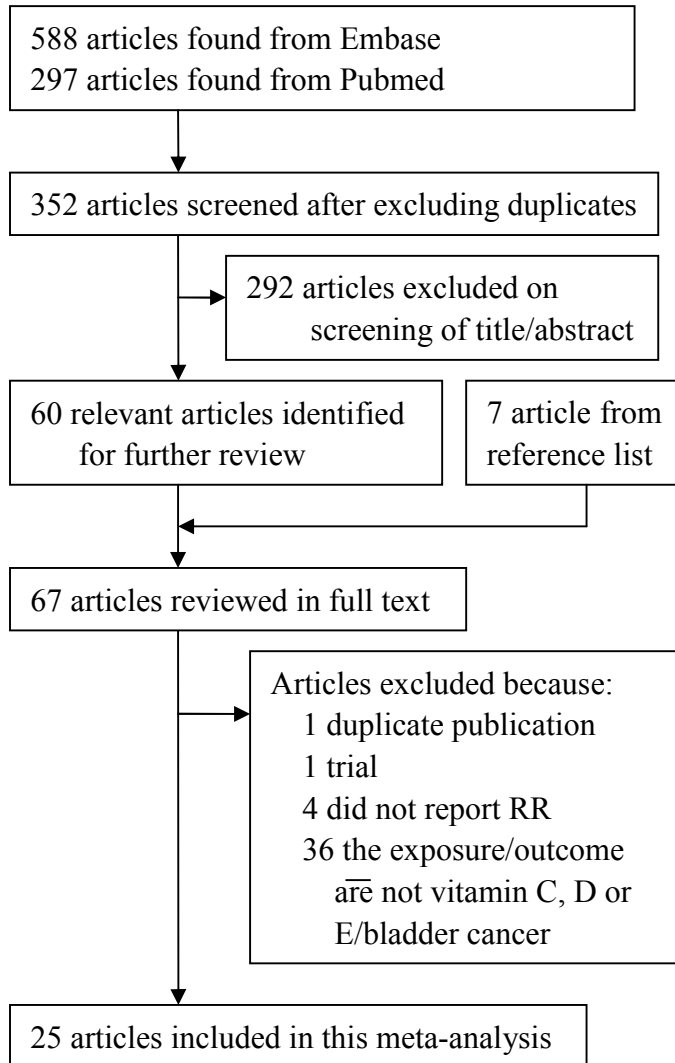

Supplementary figure 1 Flow chart for study inclusion

### Supplementary references

1. Helzlsouer, K. J., Comstock, G. W. & Morris, J. S. Selenium, lycopene, alpha-tocopherol, beta-carotene, retinol, and subsequent bladder cancer. *Cancer Res.* **49**, 6144-6148 (1989).
2. Nomura, A. M., Kolonel, L. N., Hankin, J. H. & Yoshizawa, C. N. Dietary factors in cancer of the lower urinary tract. *Int J Cancer.* **48**, 199-205 (1991).
3. Riboli, E. *et al.* Diet and bladder cancer in Spain: a multi-centre case-control study. *Int J Cancer.* **49**, 214-219 (1991).
4. Shibata, A., Paganini-Hill, A., Ross, R. K. & Henderson, B. E. Intake of vegetables, fruits, beta-carotene, vitamin C and vitamin supplements and cancer incidence among the elderly: a prospective study. *Br J Cancer.* **66**, 673-679 (1992).
5. Bruemmer, B., White, E., Vaughan, T. L. & Cheney, C. L. Nutrient intake in relation to bladder cancer among middle-aged men and women. *Am J Epidemiol.* **144**, 485-495 (1996).
6. Michaud, D. S. *et al.* Prospective study of dietary supplements, macronutrients, micronutrients, and risk of bladder cancer in US men. *Am J Epidemiol.* **152**, 1145-1153 (2000).
7. Wakai, K. *et al.* Foods and nutrients in relation to bladder cancer risk: a case-control study in Aichi Prefecture, Central Japan. *Nutr Cancer.* **38**, 13-22 (2000).
8. Zeegers, M. P., Goldbohm, R. A. & van den Brandt, P. A. Are retinol, vitamin C, vitamin E, folate and carotenoids intake associated with bladder cancer risk? Results from the Netherlands Cohort Study. *Br J Cancer.* **85**, 977-983 (2001).
9. Jacobs, E. J. *et al.* Vitamin C and vitamin E supplement use and bladder cancer mortality in a large cohort of US men and women. *Am J Epidemiol.* **156**, 1002-1010 (2002).
10. Michaud, D. S. *et al.* Intakes of fruits and vegetables, carotenoids and vitamins A, E, C in relation to the risk of bladder cancer in the ATBC cohort study. *Br J Cancer.* **87**, 960-965 (2002).
11. Nomura, A. M., Lee, J., Stemmermann, G. N. & Franke, A. A. Serum vitamins and the subsequent risk of bladder cancer. *J Urol.* **170**, 1146-1150 (2003).
12. Castela, J. E. *et al.* Carotenoids/vitamin C and smoking-related bladder cancer. *Int J Cancer.* **110**, 417-423 (2004).
13. Holick, C. N. *et al.* Intake of fruits and vegetables, carotenoids, folate, and vitamins A, C, E and risk of bladder cancer among women (United States). *Cancer Causes Control.* **16**, 1135-1145 (2005).
14. Hung, R. J. *et al.* Protective effects of plasma carotenoids on the risk of bladder cancer. *J Urol.* **176**, 1192-1197 (2006).
15. Kellen, E., Zeegers, M. & Buntinx, F. Selenium is inversely associated with bladder cancer risk: a report from the Belgian case-control study on bladder cancer. *Int J Urol.* **13**, 1180-1184 (2006).
16. Liang, D. *et al.* Plasma vitamins E and A and risk of bladder cancer: a case-control analysis. *Cancer Causes Control.* **19**, 981-992 (2008).
17. Roswall, N. *et al.* Micronutrient intake and risk of urothelial carcinoma in a prospective Danish cohort. *Eur Urol.* **56**, 764-770 (2009).

18. Brinkman, M. T. *et al.* Minerals and vitamins and the risk of bladder cancer: results from the New Hampshire Study. *Cancer Causes Control.* **21**, 609-619 (2010).
19. Brinkman, M. T. *et al.* Dietary intake of micronutrients and the risk of developing bladder cancer: results from the Belgian case-control study on bladder cancer risk. *Cancer Causes Control.* **22**, 469-478 (2011).
20. Amaral, A. F. *et al.* Plasma 25-hydroxyvitamin D(3) and bladder cancer risk according to tumor stage and FGFR3 status: a mechanism-based epidemiological study. *J Natl Cancer Inst.* **104**, 1897-1904 (2012).
21. Mondul, A. M., Weinstein, S. J., Virtamo, J. & Albanes, D. Influence of vitamin D binding protein on the association between circulating vitamin D and risk of bladder cancer. *Br J Cancer.* **107**, 1589-1594 (2012).
22. Mondul, A. M., Weinstein, S. J., Horst, R. L., Purdue, M. & Albanes, D. Serum vitamin D and risk of bladder cancer in the Prostate, Lung, Colorectal, and Ovarian (PLCO) Cancer Screening trial. *Cancer Epidemiol Biomarkers Prev.* **21**, 1222-1225 (2012).
23. Ros, M. M. *et al.* Plasma carotenoids and vitamin C concentrations and risk of urothelial cell carcinoma in the European Prospective Investigation into Cancer and Nutrition. *Am J Clin Nutr.* **96**, 902-910 (2012).
24. Afzal, S., Bojesen, S. E. & Nordestgaard, B. G. Low plasma 25-hydroxyvitamin D and risk of tobacco-related cancer. *Clin Chem.* **59**, 771-780 (2013).
25. Park, S. Y. *et al.* Fruit and vegetable intakes are associated with lower risk of bladder cancer among women in the Multiethnic Cohort Study. *J Nutr.* **143**, 1283-1292 (2013).
